# Supplementary material for: Professionally designed information materials and telephone reminders improved consent response rates: evidence from an RCT nested within a cohort study
Source: PubMed Central journal article supplement (PMC4503222; doi:10.1016/j.jclinepi.2015.03.014), 2015-08
Supplement: mmc1.pdf [file mmc1.pdf]

**Information design and telephone reminders improved response rates in a cohort study: evidence from a randomised controlled trial.**

**Supplementary (Web Only) Materials.**

*Response by Socio-Demographic Characteristic*

The response rates by category values were: sex (46.3% from females, 36.3% from males), ethnicity (39.8% from white participants, 34.6% from non-white participants), participation history (60.8% from those with a very high rate of historical participation, 25.3% from those with lower rates), educational attainment (46.3% from participants with five or more Grade A\*-C KS4 results, 23.4% from those with less than five A\*-C grades), low household income (33.0% from households eligible to receive FSM and 39.9% from households with income above the FSM threshold). It is important to note the relatively small sample sizes where the responding participant was from a low income household or was non-white.

Supplementary Figure 1: Response to the PEARL trial mailings, by time elapsed from the mailing of the information pack intervention.

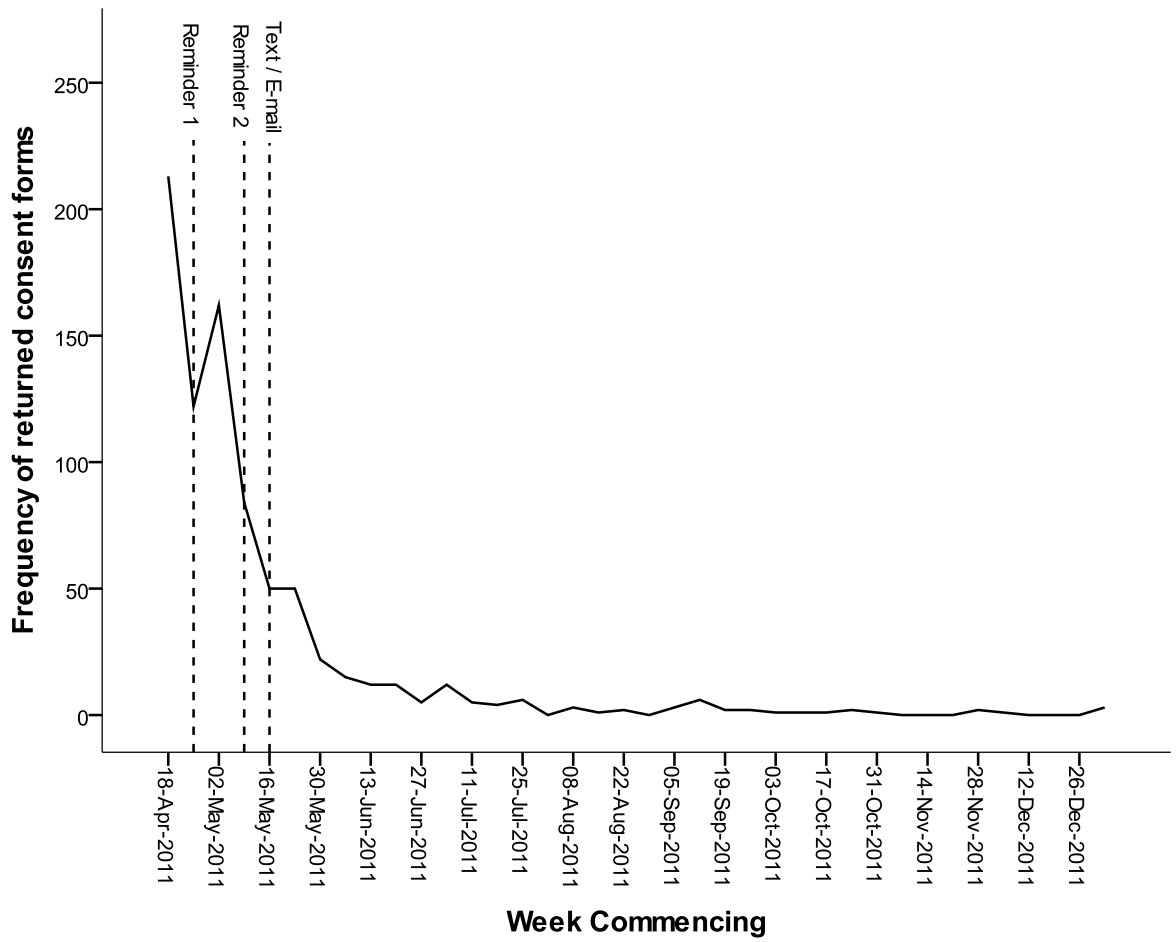

Supplementary Table 1. Response rates following the non-intervention reminder postcard, by prior-notification and information pack interventions.

| Intervention                          | %Response Rate<br>(n/n) |                    | % Difference<br>in Response | 95% CI    | P-value |
|---------------------------------------|-------------------------|--------------------|-----------------------------|-----------|---------|
|                                       | Intervention            | Control            |                             |           |         |
|                                       | Group                   | Group              |                             |           |         |
| 1. Prior-notification<br>intervention | 18.1*<br>(158/872)      | 16.9*<br>(146/865) | 1.2                         | -2.3, 4.8 | 0.5     |
| 2. Information Pack<br>Intervention   | 16.2*<br>(139/858)      | 18.8*<br>(165/879) | -2.6                        | -6.1, 0.1 | 0.2     |

\* ITT approach (Figure 1)

Supplementary Table 2: A comparison of socio-demographic characteristics between a national sample, the ALSPAC enrolled sample and the PEARL RCT sample and PEARL RCT responding sample

|                                     |                  | National comparable sample <sup>a</sup> | ALSPAC enrolled sample <sup>b</sup> | PEARL RCT analysable sample         | PEARL RCT responders            |
|-------------------------------------|------------------|-----------------------------------------|-------------------------------------|-------------------------------------|---------------------------------|
| Characteristic                      | Category         |                                         |                                     |                                     |                                 |
| Child sex                           | Female           | 871,375/1,770,654<br>(49.2%)            | 5,470/11,008<br>(49.7%)             | 986/1,950 <sup>h</sup><br>(50.6%)   | 456/806 <sup>m</sup><br>(56.6%) |
| Child ethnicity                     | White            | 1,508,926/1,744,429<br>(86.5%)          | 10,505/10,933<br>(96.1%)            | 1,428/1,561 <sup>k</sup><br>(91.5%) | 568/614 <sup>n</sup><br>(92.5%) |
| Participation History <sup>c</sup>  | Very High        | n/a                                     | 3,310/14,806<br>(22.4%)             | 880/1,950 <sup>h</sup><br>(45.1%)   | 535/806 <sup>m</sup><br>(66.4%) |
| Educational Attainment <sup>e</sup> | KS4 >= 5 grades  | 993,079/1,770,673<br>(56.1%)            | 6,493/10,805<br>(60.1%)             | 1,098/1,569 <sup>k</sup><br>(70.0%) | 508/618 <sup>n</sup><br>(82.2%) |
|                                     | A*-C             |                                         |                                     |                                     |                                 |
| Low household income <sup>f</sup>   | Eligible for FSM | 218,033/1,745,353<br>(12.5%)            | 682/10,959<br>(6.2%)                | 91/1,561 <sup>k</sup><br>(5.8%)     | 30/616 <sup>n</sup><br>(4.9%)   |
| Tertile of IMD <sup>g</sup>         | 1 (low)          |                                         |                                     | 527/1,950 <sup>h</sup><br>(27.0%)   | 157/806 <sup>m</sup><br>(19.5%) |
|                                     | 2                | n/a                                     | n/a                                 | 715/1,950 <sup>h</sup><br>(36.7%)   | 330/806 <sup>m</sup><br>(40.9%) |
|                                     | 3 (High)         |                                         |                                     | 708/1,950 <sup>h</sup><br>(36.3%)   | 319/806 <sup>m</sup><br>(39.6%) |

---

<sup>a</sup> All pupils from the National Pupil Database (NPD) Key Stage 4 (KS4) English Government Maintained Establishments (GME) sample who are in the three academic year groups which include ALSPAC participants.

<sup>b</sup> All pupils, from English GMEs, who are from families that have enrolled in ALSPAC.

<sup>c</sup> 'Very High' indicates a participation history score of  $\geq 90$ .

<sup>e</sup> Academic attainment at the age of 16 years (achieving five or more assessments classed as grades A\* to C, where A\* signifies the highest level of attainment).

<sup>f</sup> Eligible for 'free school meals' (FSM), indicating a joint parental income of  $\leq \pounds 16\,000$ .

<sup>g</sup> Tertiles of IMD 2010, where 1 indicates the most deprived neighbourhoods (tertiles were set nationally and then mapped to ALSPAC participants using residential postcode)

<sup>h</sup> Denominator: the PEARL analysable sample

<sup>k</sup> Denominator: cases in the PEARL analysable sample, from English GMEs, with a valid record

<sup>m</sup> Denominator: PEARL RCT respondents

<sup>n</sup> Denominator: PEARL RCT respondents, from English GMEs, with a valid record

**Supplementary Table 3: Sub-group analysis: response rates by intervention and socio-demographic characteristics.**

| Characteristic         | Category       | Prior-notification             |                                  |     | Information Pack |                  |     | Reminder          |                      |      |
|------------------------|----------------|--------------------------------|----------------------------------|-----|------------------|------------------|-----|-------------------|----------------------|------|
|                        |                | Intervention*                  |                                  |     | Intervention*    |                  |     | Intervention†     |                      |      |
|                        |                | % response                     |                                  |     | % response       |                  |     | % response        |                      |      |
|                        |                | Prior-Notification<br>Postcard | No Prior-Notification<br>Mailing | P‡  | Designed<br>Pack | Standard<br>Pack | P‡  | Phone<br>Reminder | Postcard<br>Reminder | P‡   |
| Sex                    | Male           | 8.5                            | 8.3                              | 0.9 | 9.77             | 7.04             | 0.7 | 21.3              | 13.6                 | 0.3  |
|                        | Female         | 13.3                           | 13.4                             |     | 14.69            | 12.07            |     | 25.7              | 20.8                 |      |
| Ethnicity <sup>§</sup> | White          | 11.7                           | 11.5                             | 0.9 | 12.9             | 10.2             | 0.3 | 21.1              | 14.6                 | 0.9  |
|                        | Non-White      | 7.0                            | 6.5                              |     | 10.3             | 4.0              |     | 23.5              | 15.8                 |      |
| Tertile of Indices     | Ttile 1 (low)  | 9.2                            | 6.4                              | 0.4 | 9.2              | 6.4              | 0.8 | 18.7              | 8.0                  | 0.09 |
| Multiple Deprivation   | Ttile 2        | 12.3                           | 12.3                             |     | 13.2             | 11.4             |     | 25.3              | 22.1                 |      |
| (IMD) 2007             | Ttile 3 (high) | 10.9                           | 12.9                             |     | 13.6             | 10.2             |     | 25.7              | 19.3                 |      |

|                                    |                          |      |      |     |      |      |     |      |      |       |
|------------------------------------|--------------------------|------|------|-----|------|------|-----|------|------|-------|
| Free School Meals (FSM)            | Receives FSM             | 16.3 | 11.9 | 0.5 | 13.2 | 15.1 | 0.4 | 13.9 | 11.8 | 0.7   |
|                                    | No FSM                   | 11.0 | 11.2 |     | 12.8 | 9.4  |     | 22.0 | 15.1 |       |
| # Key Stage 4 Grades A*-C          | Less than Five           | 6.8  | 6.3  | 0.9 | 6.8  | 6.4  | 0.5 | 16.0 | 4.3  | 0.004 |
|                                    | Greater or Equal to Five | 13.3 | 13.1 |     | 15.3 | 11.1 |     | 24.2 | 20.7 |       |
| ALSPAC Participation History Score | <90                      | 6.5  | 6.2  | 0.7 | 6.4  | 6.3  | 0.2 | 15.7 | 9.0  | 0.2   |
|                                    | >=90                     | 16.2 | 16.7 |     | 19.3 | 13.6 |     | 37.5 | 30.6 |       |

---

\* ITT approach(Figure 1)

† mITT approach (Figure 2)

‡ Test for interaction

§ The PEARL RCT sample has relatively small numbers of non-white participants (total n=135)

**Supplementary Table 4: Consent rates by trial intervention and consent category**

| <b>Consent</b>                       | <b>Prior-notification</b> |                              |           | <b>Information Pack</b>  |                 |           | <b>Reminder</b>          |                   |           |
|--------------------------------------|---------------------------|------------------------------|-----------|--------------------------|-----------------|-----------|--------------------------|-------------------|-----------|
|                                      | <b>Intervention*</b>      |                              |           | <b>Intervention*</b>     |                 |           | <b>Intervention†</b>     |                   |           |
|                                      | <i>% consented (n/n)</i>  |                              |           | <i>% consented (n/n)</i> |                 |           | <i>% consented (n/n)</i> |                   |           |
| <b>Category</b>                      | <i>Prior-notification</i> | <i>No Prior-Notification</i> | <i>P‡</i> | <i>Designed</i>          | <i>Standard</i> | <i>P‡</i> | <i>Phone</i>             | <i>Postcard</i>   | <i>P‡</i> |
|                                      | <i>Postcard</i>           | <i>Mailing</i>               |           | <i>Pack</i>              | <i>Pack</i>     |           | <i>Reminder</i>          | <i>Reminder</i>   |           |
| Participation in ALSPAC              | 95.3<br>(102/107)         | 98.1<br>(104/106)            | 0.6       | 96.7<br>(116/120)        | 96.8<br>(90/93) | 0.6       | 91.5<br>(151/165)        | 96.0<br>(119/124) | 0.3       |
| Linkage to Health Records            | 92.5<br>(99/107)          | 97.2<br>(103/106)            | 0.2       | 96.7<br>(116/120)        | 92.5<br>(86/93) | 0.2       | 87.9<br>(145/165)        | 90.3<br>(112/124) | 0.6       |
| Linkage to School Records            | 93.5<br>(100/107)         | 98.1<br>(104/106)            | 0.2       | 96.7<br>(116/120)        | 94.6<br>(88/93) | 0.5       | 87.9<br>(145/165)        | 91.9<br>(114/124) | 0.3       |
| Linkage to Further Education Records | 92.5<br>(99/107)          | 97.2<br>(103/106)            | 0.2       | 95.8<br>(115/120)        | 93.6<br>(87/93) | 0.5       | 87.9<br>(145/165)        | 91.9<br>(114/124) | 0.3       |



|                                          |                   |                   |     |                   |                 |     |                   |                   |     |
|------------------------------------------|-------------------|-------------------|-----|-------------------|-----------------|-----|-------------------|-------------------|-----|
| Linkage to Higher Education Records      | 95.5<br>(99/107)  | 96.2<br>(102/106) | 0.2 | 94.2<br>(113/120) | 94.6<br>(88/93) | 1.0 | 86.7<br>(143/165) | 91.9<br>(114/124) | 0.3 |
| Linkage to Financial and Benefit Records | 86.0<br>(92/107)  | 90.6<br>(96/106)  | 0.1 | 89.2<br>(107/120) | 87.1<br>(81/93) | 0.8 | 80.0<br>(132/165) | 80.7<br>(100/124) | 1.0 |
| Linkage to Criminal Records              | 93.5<br>(100/107) | 94.3<br>(100/106) | 0.4 | 94.2<br>(113/120) | 93.6<br>(87/93) | 1.0 | 81.8<br>(135/165) | 88.7<br>(110/124) | 0.2 |

\* ITT approach (see Figure 1 in manuscript)

† mITT approach (see Figure 1 in manuscript)

‡ Fishers exact test
